# Supplementary material
Source: publisher site journal article supplement (https://www.spandidos-publications.com/3596/downloadSupplementary)

Figure S1. Transfection efficiencies of (A) sh-TNF- $\alpha$ , (B) sh-TRAF-1 and (C) sh-SOCS3 by western blotting. \*\*\*\*P<0.0001, vs. Control group; #####P<0.0001, vs. sh-TNF- $\alpha$  group/sh-RNA group. TNF, tumor necrosis factor; sh-, short interfering RNA; NC, negative control; COPD, chronic obstructive pulmonary disease.

**A**

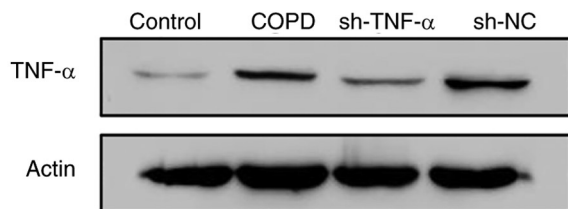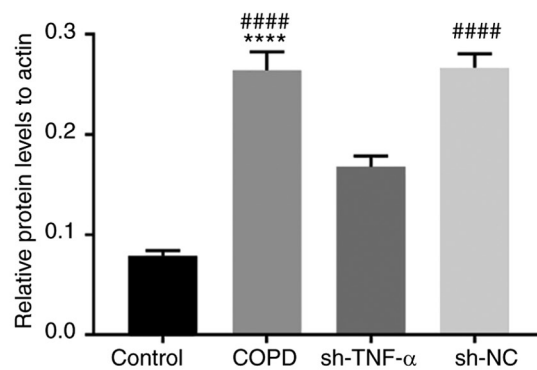

**B**

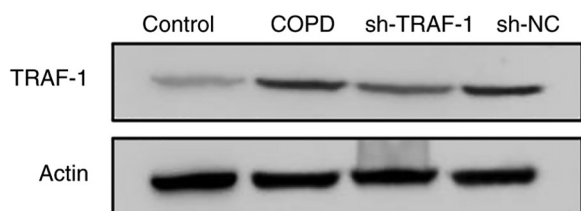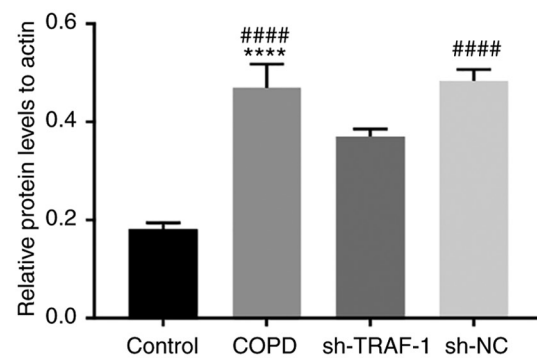

**C**

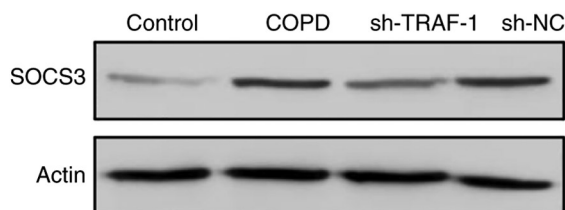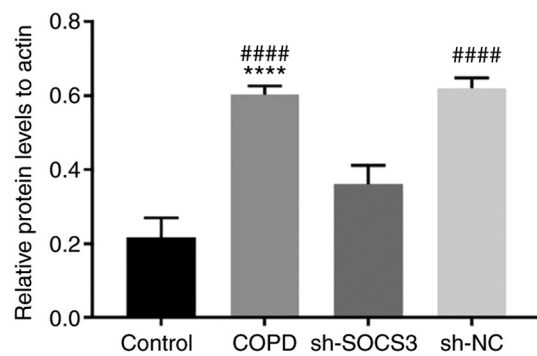

Figure S2. Signalling pathway selection. The Kyoto Encyclopedia of Genes and Genomes database (<https://www.genome.jp/kegg/kegg2.html>) was used to identify TNF signalling pathway, and the MAPK signalling pathway as well as downstream signalling molecules (TRAF1 and SOCS3) were chosen. TNF, tumor necrosis factor.

TNF SIGNALING PATHWAY

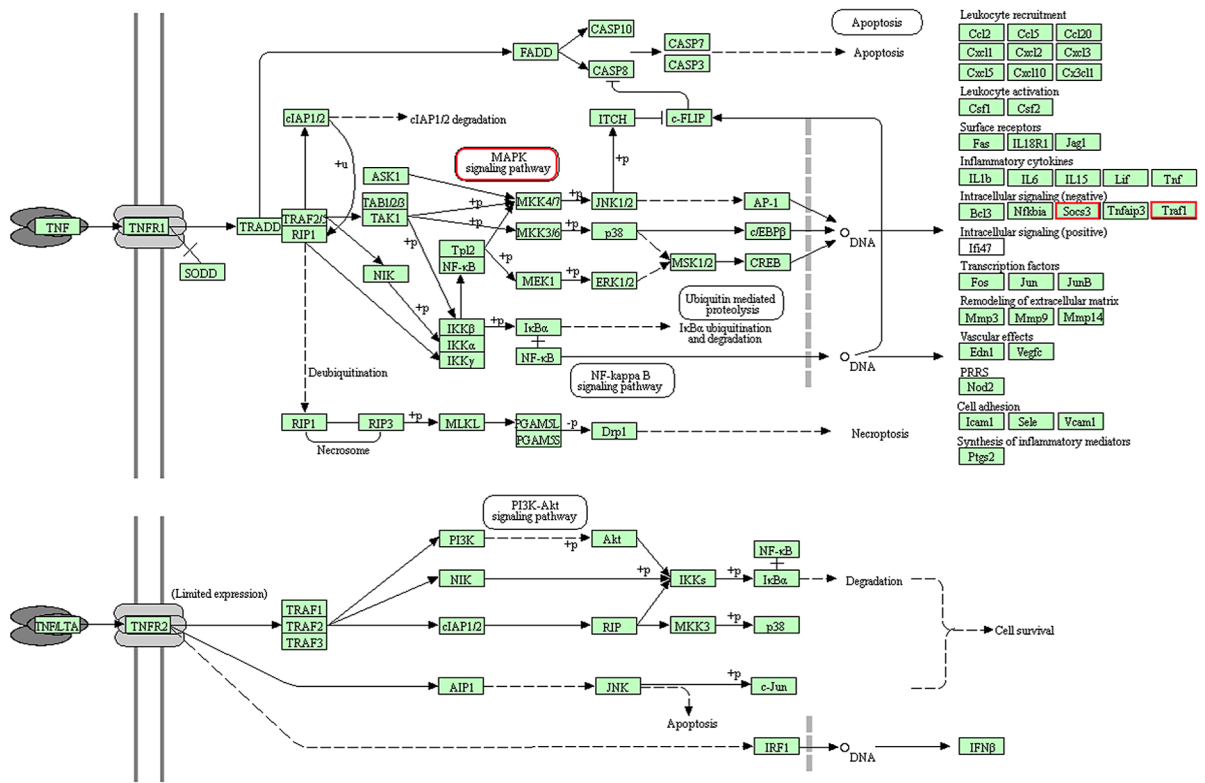

Supplement: Supplementary file 1 [file downloadSupplementary]
